# Supplementary material
Source: ML conference proceedings conference paper supplement (https://openreview.net/forum?id=CmKar1zptJ)
Supplement: supplementary_material [file main_and_supplementary.pdf › main_and_supplementary.pdf]

---

# Post Hoc Regression Refinement via Pairwise Rankings

---

Anonymous Author(s)

Affiliation

Address

email

## Abstract

1 Accurate prediction of continuous properties is essential to many scientific and  
2 engineering tasks. Although deep-learning regressors excel with abundant labels,  
3 their accuracy deteriorates in data-scarce regimes. We introduce RankRefine,  
4 a model-agnostic, plug-and-play post hoc method that refines regression with  
5 expert knowledge coming from pairwise rankings. Given a query item and a small  
6 reference set with known properties, RankRefine combines the base regressor’s  
7 output with a rank-based estimate via inverse-variance weighting, requiring no  
8 retraining. In molecular property prediction task, RankRefine achieves up to  
9 10% relative reduction in mean absolute error using only 20 pairwise comparisons  
10 obtained through a general-purpose large language model (LLM) with no finetuning.  
11 As rankings provided by human experts or general-purpose LLMs are sufficient for  
12 improving regression across diverse domains, RankRefine offers practicality and  
13 broad applicability, especially in low-data settings.

## 14 1 Introduction

15 Accurate prediction of continuous properties is crucial across scientific and engineering disciplines.  
16 In molecular-property prediction (MPP), for instance, reliable estimates of physical or chemical  
17 attributes can accelerate drug discovery, materials design, and catalyst development. Recent advances  
18 in deep learning have enhanced regression models by leveraging large datasets to uncover complex,  
19 nonlinear relationships between structured inputs (e.g., molecular graphs, crystal structures) and  
20 their associated properties. Yet, unlike computer vision or natural-language processing, where  
21 large labeled corpora can be mined or crowd-sourced, many specialized fields face a fundamental  
22 bottleneck: acquiring ground-truth labels requires expert-led experiments that are both costly and  
23 slow. Consequently, real-world tasks often operate in data-scarce regimes where even 50 labeled  
24 samples may be considered plentiful [Sun et al., 2024].

25 When large-scale labels are unavailable, expert knowledge becomes a valuable but under-utilized asset.  
26 One accessible form of such knowledge is relative comparison: pairwise judgments about which  
27 of two samples exhibits a higher (or lower) property value. Pairwise rankings convey substantial  
28 information, are often easier for human experts to provide, and can even be generated by general-  
29 purpose large language models (LLMs), which have shown surprising ranking skills in chemistry and  
30 related domains [Sun et al., 2025, Guo et al., 2023].

31 We introduce RankRefine, a post-hoc refinement framework that improves regression predictions by  
32 incorporating pairwise rankings. Given a query sample and a small set of labeled references, which  
33 can conveniently be drawn from training data, a ranker infers the relative ordering between the query  
34 and each reference; these comparisons define a likelihood whose minimization yields a rank-based  
35 property estimate. RankRefine then fuses this estimate with the base regressor’s prediction via  
36 inverse-variance weighting, all without retraining.

Because RankRefine is largely model-agnostic and requires no architectural changes, it suits low-data, few-shot, and meta-learning scenarios. Leveraging ranking signals from publicly hosted LLMs, it provides substantial improvements in regression accuracy with minimal labeled data and negligible client-side computation. Experiments on synthetic and real-world benchmarks, including multiple MPP tasks, demonstrate that RankRefine consistently boosts predictive performance. Further analysis links its effectiveness to ranking quality, underscoring the promise of LLMs and other expert-informed rankers as practical complements to data-scarce regression models. The source code is provided in the supplementary materials.

## 2 Background

### 2.1 Combining Regression and Ranking

Huang et al. [2024] reformulate regression as joint regression–pairwise-ranking objectives and show that the combination improves predictive accuracy. Tynes et al. [2021], Fralish et al. [2023] instead train a regressor to predict pairwise differences in molecular properties; at inference, a query molecule is compared with reference molecules of known labels, and the mean of the predicted differences yields the final estimate. The post hoc method proposed by Gonçalves et al. [2023] refines regression outputs by computing a weighted average of the original prediction and those of its top-k nearest neighbors.

A closely related approach is the consolidation method for document relevance proposed by Yan et al. [2024]. Given a pointwise rating and a set of pairwise comparisons, their post-processor makes minimal adjustments to preserve the ranker-derived inequalities. For a one-dimensional rating  $\hat{y}$  this projection simplifies to

$$\hat{y}^* = \max(\min(\hat{y}, U), L),$$

where  $L$  and  $U$  are the lower and upper bounds of the feasible interval.

Preference learning with Gaussian processes [Chu and Ghahramani, 2005, Houthby et al., 2012, Chau et al., 2022] utilize pairwise data but differ fundamentally from our setting. Preference learning assumes a latent score  $f(x)$  whose absolute scale is irrelevant; the aim is to preserve ordering and learn-to-rank, not to predict calibrated values. In contrast, we target real-world quantities, e.g., solubility or toxicity, and treat pairwise comparisons as auxiliary signals that refine supervised regression into meaningful, calibrated estimates. Similarly, many learning-to-rank approaches [Burges et al., 2005, Yildiz et al., 2020, Tom et al., 2024] may seem related to our work, but they actually address a different problem, i.e., ranking rather than regression.

### 2.2 LLM as a Pairwise Ranker

Large language models (LLMs) have recently been explored in molecular-property prediction and generation [Sun et al., 2025]. Several efforts fine-tune GPT-3- or LLaMA-based models with chemistry-specific prompts [Jablonka et al., 2024, Xie et al., 2024, Jacobs et al., 2024], while MolecularGPT [Liu et al., 2024] is instruction-tuned on 1 000 property-prediction tasks and achieves few-shot performance competitive with graph neural networks.

Fine-tuning, however, is resource-intensive and incurs substantial computational overhead. We therefore ask: can general-purpose, publicly hosted LLMs be leveraged directly, without domain-specific adaptation? We hypothesize that such models can supply useful signals when deployed as pairwise rankers.

Human cognition offers an analogue. People often judge quantities either by estimating absolute magnitudes (regression) or by deciding which of two items is greater (ranking). A long-standing hypothesis holds that comparative judgments are easier and less biased [Thurstone, 1927, Miller, 1956, Stewart et al., 2005]. Pairwise tasks impose lower cognitive load [Routh et al., 2023] and avoid scale-interpretation bias [Hoeijmakers et al., 2024]. Because LLMs are pretrained on corpora rich in relative statements and later aligned with human feedback [Zhang et al., 2023, Bai et al., 2022, Rafailov et al., 2023], they may inherit a similar advantage. As a real example, Guo et al. [2023] show that off-the-shelf LLMs rival domain-specific models on chemistry classification and ranking benchmarks, underscoring the promise of pairwise prompting in specialized tasks.

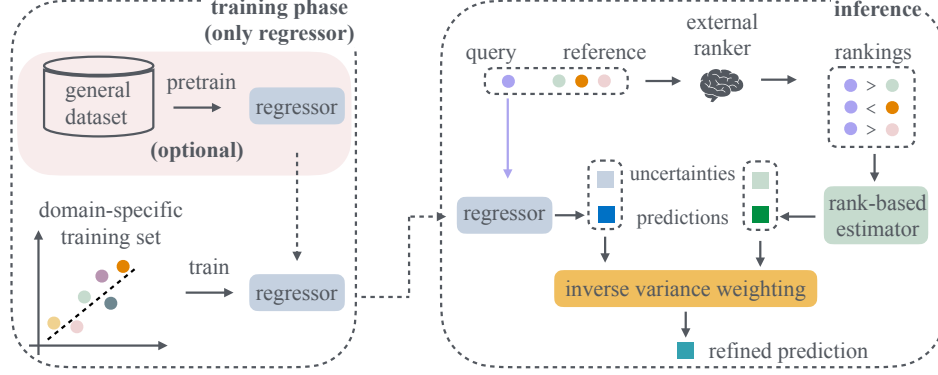

Figure 1: Overview of the RankRefine framework. During training, a regressor is trained using labeled data. At inference, a query sample is paired with reference samples with known properties and compared by an external ranker to produce pairwise rankings. These rankings are used to estimate the query’s property value via a rank-based estimator. The final prediction is obtained by fusing the regressor’s output and the rank-based estimate using inverse variance weighting.

### 3 Method

Our goal is to reduce the test-time error of an existing regressor by fusing its prediction with pairwise-ranking information in a plug-and-play fashion. We present RankRefine, a framework that augments a base regressor with rankings from an external source (e.g., an LLM or a domain expert). RankRefine is largely model-agnostic and applies to any regressor that returns both a point estimate and an uncertainty measure, for example Gaussian processes or random forests.

We assume access to a reference set  $\mathbb{D} = \{(x_i, y_i)\}_{i=1}^k$  with known property values. This reference set can be drawn from the training set. At inference, the regressor predicts the property of a query sample  $x_0$ , giving  $\hat{y}_0^{\text{reg}}$ , while the ranker supplies pairwise comparisons between  $x_0$  and each  $x_i \in \mathbb{D}$ .

#### 3.1 RankRefine

Let  $\hat{y}_0^{\text{reg}} \sim \mathcal{N}(y_0, \sigma_{\text{reg}}^2)$  be the regressor’s unbiased Gaussian estimate of the true property  $y_0$ . A second, rank-based estimate  $\hat{y}_0^{\text{rank}}$  is derived from the comparisons. Under these assumptions, the optimal fusion of the two estimates reduces to the inverse-variance weighting [Cochran and Carroll, 1953], formalized below.

**Theorem 3.1 (RankRefine Fusion Theorem)** *If  $\hat{y}_0^{\text{reg}}$  and  $\hat{y}_0^{\text{rank}}$  are independent, unbiased Gaussian estimators of  $y_0$  with variances  $\sigma_{\text{reg}}^2$  and  $\sigma_{\text{rank}}^2$ , the minimum-variance unbiased estimator is*

$$\hat{y}_0^* = \sigma_{\text{post}}^2 \left( \frac{\hat{y}_0^{\text{reg}}}{\sigma_{\text{reg}}^2} + \frac{\hat{y}_0^{\text{rank}}}{\sigma_{\text{rank}}^2} \right), \quad \sigma_{\text{post}}^2 = \left( \frac{1}{\sigma_{\text{reg}}^2} + \frac{1}{\sigma_{\text{rank}}^2} \right)^{-1}. \quad (1)$$

See supplementary materials for the proof.

**Rank-based estimate.** Pairwise probabilities follow the Bradley–Terry model [Bradley and Terry, 1952],  $P(x_i \succ x_j) = s(y_i - y_j)$  with sigmoid function  $s(z) = (1 + e^{-z})^{-1}$ . Indexing the query as  $i = 0$  and references as  $i > 0$ , we obtain  $\hat{y}_0^{\text{rank}}$  by minimizing the negative log-likelihood

$$\hat{y}_0^{\text{rank}} = \arg \min_{\hat{y}_0^{\text{rank}}} \left[ -\sum_{x_i \in \mathbb{A}} \log s(\hat{y}_0^{\text{rank}} - y_i) - \sum_{x_j \in \mathbb{B}} \log(1 - s(\hat{y}_0^{\text{rank}} - y_j)) \right], \quad (2)$$

where  $\mathbb{A}$  contains references ranked below  $x_0$  and  $\mathbb{B}$  those ranked above.

**Lemma 3.2 (Variance of the rank-based estimate)** *Let  $\hat{y}_0^{\text{rank}}$  minimize equation 2. Its variance is approximated by the inverse observed Fisher information Ly et al. [2017],*

$$\sigma_{\text{rank}}^2 \approx \left[ \sum_{y_i \in \mathbb{A} \cup \mathbb{B}} s(\Delta_i)(1 - s(\Delta_i)) \right]^{-1}, \quad \text{with } \Delta_i = \hat{y}_0^{\text{rank}} - y_i. \quad (3)$$

109 Applying Theorem 3.1 with  $\sigma_{\text{rank}}^2$  from Lemma 3.2 yields  $\hat{y}_0^*$ .

### 110 3.2 Analysis of RankRefine

111 We measure performance via the mean absolute error (MAE). For a folded Gaussian derived from a  
112 zero-mean Gaussian,  $\text{MAE} = \sqrt{2/\pi} \sigma$ , so

$$\text{MAE}_{\text{post}} < \text{MAE}_{\text{reg}} \iff \sigma_{\text{post}}^2 < \sigma_{\text{reg}}^2.$$

113 **Corollary 3.2.1** *Any informative ranker with finite variance ( $\sigma_{\text{rank}}^2 < \infty$ ) lowers the expected MAE*  
114 *after fusion.*

115 More generally, letting  $\alpha \in [0, 1]$  be the desired ratio between post-refinement and the original  
116 MAEs,

$$\text{MAE}_{\text{post}} \leq \alpha \text{MAE}_{\text{reg}} \iff \sigma_{\text{rank}}^2 \leq \frac{\alpha^2 \sigma_{\text{reg}}^2}{1 - \alpha^2}. \quad (4)$$

117 **Regularization.** If the ranker is biased yet over-confident ( $\sigma_{\text{rank}}^2 \ll \sigma_{\text{reg}}^2$ ), we temper its variance via

$$\sigma_{\text{rank}}^2 \leftarrow \max(\sigma_{\text{rank}}^2, c \sigma_{\text{reg}}^2),$$

118 with user-chosen constant  $c > 0$ .

## 119 4 Experimental Results

120 We evaluate RankRefine on synthetic and real-world tasks. After outlining datasets, metrics, and  
121 implementation details, we report results in synthetic settings, where ranking oracle is available, and  
122 practical settings across multiple domains.

### 123 4.1 Experimental Setup

124 We use nine molecular datasets from the TDC ADME benchmark [Huang et al., 2021]: Caco-2  
125 [Wang et al., 2016], Clearance Microsome and Clearance Hepatocyte [Di et al., 2012], log Half-  
126 Life [Obach et al., 2008], FreeSolv [Mobley and Guthrie, 2014], Lipophilicity [Wu et al., 2018],  
127 PPBR, Solubility [Sorkun et al., 2019], and VDss [Lombardo and Jing, 2016]. We additionally  
128 test three tabular regressions: crop-yield prediction from sensor data [Soundankar, 2025], student-  
129 performance prediction [Cortez, 2014], international-education cost estimation [Shamim, 2025]. In  
130 the human-as-ranker experiment, we use UTKFace [Zhang et al., 2017] for age estimation.

131 To emulate low-data regimes, we sample 50 training points from above datasets uniformly at random  
132 and merge the remainder with the original test split, repeating this re-split over five random seeds.

133 The primary metric is the mean absolute error (MAE). We report the *normalized error*

$$\beta = \frac{\text{MAE}_{\text{post}}}{\text{MAE}_{\text{reg}}},$$

134 where  $\beta < 1$  indicates improvement.

135 Suppose that a pairwise ranker  $R$  evaluates a pair of inputs  $(x_i, x_j)$ . The ranker returns  $R(x_i, x_j) = 0$   
136 if it predicts  $x_i \succ x_j$ , and  $R(x_i, x_j) = 1$  otherwise. The pairwise ranker quality can be measured via  
137 pairwise ranking accuracy (PRA), defined as,

$$\text{PRA} = \frac{1}{|\mathbb{P}|} \sum_{(i,j) \in \mathbb{P}} \mathbb{I}(R(x_i, x_j) = \mathbb{I}(y_i < y_j)),$$

138 where  $\mathbb{P} = \{(i, j) | i \neq j\}$  is the set of all comparable pairs with ground-truth labels  $y_i, y_j$ , and  $\mathbb{I}$  is  
139 the indicator function which return 1 if the condition is true, and 0 otherwise. Unless stated otherwise,  
140 the base model is a random-forest regressor from scikit-learn [Pedregosa et al., 2011] with default  
141 hyper-parameters, executed on a single CPU.

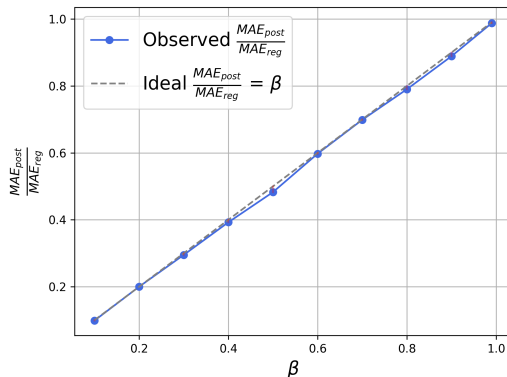

Figure 2: Empirical validation of the theoretical MAE reduction bound under ideal conditions. For each target improvement factor  $\beta$ , we compute the required ranker variance  $\sigma_{\text{rank}}^2$  using the right-side inequality in Implication 4. We simulate predictions from an oracle regressor ( $y_0^{\text{reg}} \sim \mathcal{N}(y_0, 1)$ ) and an oracle ranker ( $\hat{y}_0^{\text{rank}} \sim \mathcal{N}(y_0, \sigma_{\text{rank}}^2)$ ), and compute the fused estimate. The observed post-refinement MAE ratios match the ideal  $\beta$  values, demonstrating the correctness of the fusion rule under Gaussian distribution assumptions.

## 142 4.2 Verifying Theoretical MAE Reduction Under Ideal Conditions

143 To validate Implication 4, we simulate unbiased oracle predictions with known variances. For  
 144 target factors  $\beta \in \{0.10, 0.20, \dots, 0.90, 0.99\}$ , the required ranker variance  $\sigma_{\text{rank}}^2$  is obtained from  
 145 the right-side inequality of Implication 4. Synthetic estimates are drawn as  $\hat{y}_0^{\text{reg}} \sim \mathcal{N}(y_0, 1)$  and  
 146  $\hat{y}_0^{\text{rank}} \sim \mathcal{N}(y_0, \sigma_{\text{rank}}^2)$ . The fused prediction  $\hat{y}_0^*$  follows Equation 1. Figure 2 confirms that empirical  
 147 MAE ratios match the prescribed targets.

## 148 4.3 Effect of Ranker Accuracy and Reference Sample Size on Molecular-Property Prediction 149 with RankRefine

150 Using the nine TDC datasets, we vary oracle ranker accuracy and the number  $k$  of reference com-  
 151 parisons per query. Figure 3 plots  $\beta$ , the post refinement MAE error divided by the regression error,  
 152 versus pairwise ranker accuracy. RankRefine consistently lowers error, even with accuracy  $\approx 0.55$   
 153 and  $k = 10$ . Increasing the number of pairwise comparisons  $k$  tend to further lower  $\beta$ . We observe  
 154 that  $k = 20$  is optimal, as the difference between  $k = 20$  and  $k = 30$  is often minimal.

155 For very accurate rankers ( $> 0.95$ ) a slight uptick in  $\beta$  arises from over-confident curvature estimates  
 156 and extreme solutions when the query is an outlier. For the first source, recall that  $\sigma_{\text{rank}}^2$  is approximated  
 157 by the second derivative of the negative log-likelihood. This curvature becomes smaller as the ranker  
 158 accuracy approaches perfection, leading to over-confident estimates. For the second source, consider  
 159 the case when the query is truly the smallest or largest value among the reference set. This is  
 160 especially common when  $k$  is small and ranker is accurate. The optimizer may push  $\hat{y}_0^{\text{rank}}$  toward  
 161 extreme values that still satisfy pairwise ranking constraints, but overshoot the true property value  $y_0$ .

## 162 4.4 Cross-Domain Generalization

163 Applying the same protocol to the three tabular datasets yields Figure 4, whose reductions mirror  
 164 those in chemistry datasets. The results show that RankRefine generalizes beyond molecular tasks.

## 165 4.5 Comparison with Other Baselines

166 We compare against two post hoc refinement methods: constrained optimization Yan et al. [2024]  
 167 and regression by re-ranking (RbR) Gonçalves et al. [2023]. We reimplemented the two baselines  
 168 from scratch, as no publicly available code was provided. We use  $k = 30$  comparisons. Figure 5  
 169 displays  $\beta_{\text{ours}} - \beta_{\text{projection}}$  and  $\beta_{\text{ours}} - \beta_{\text{reranking}}$ ; negative values favour RankRefine. Our approach  
 170 generally outperforms RbR in all datasets. Against the projection-based baseline, RankRefine excels

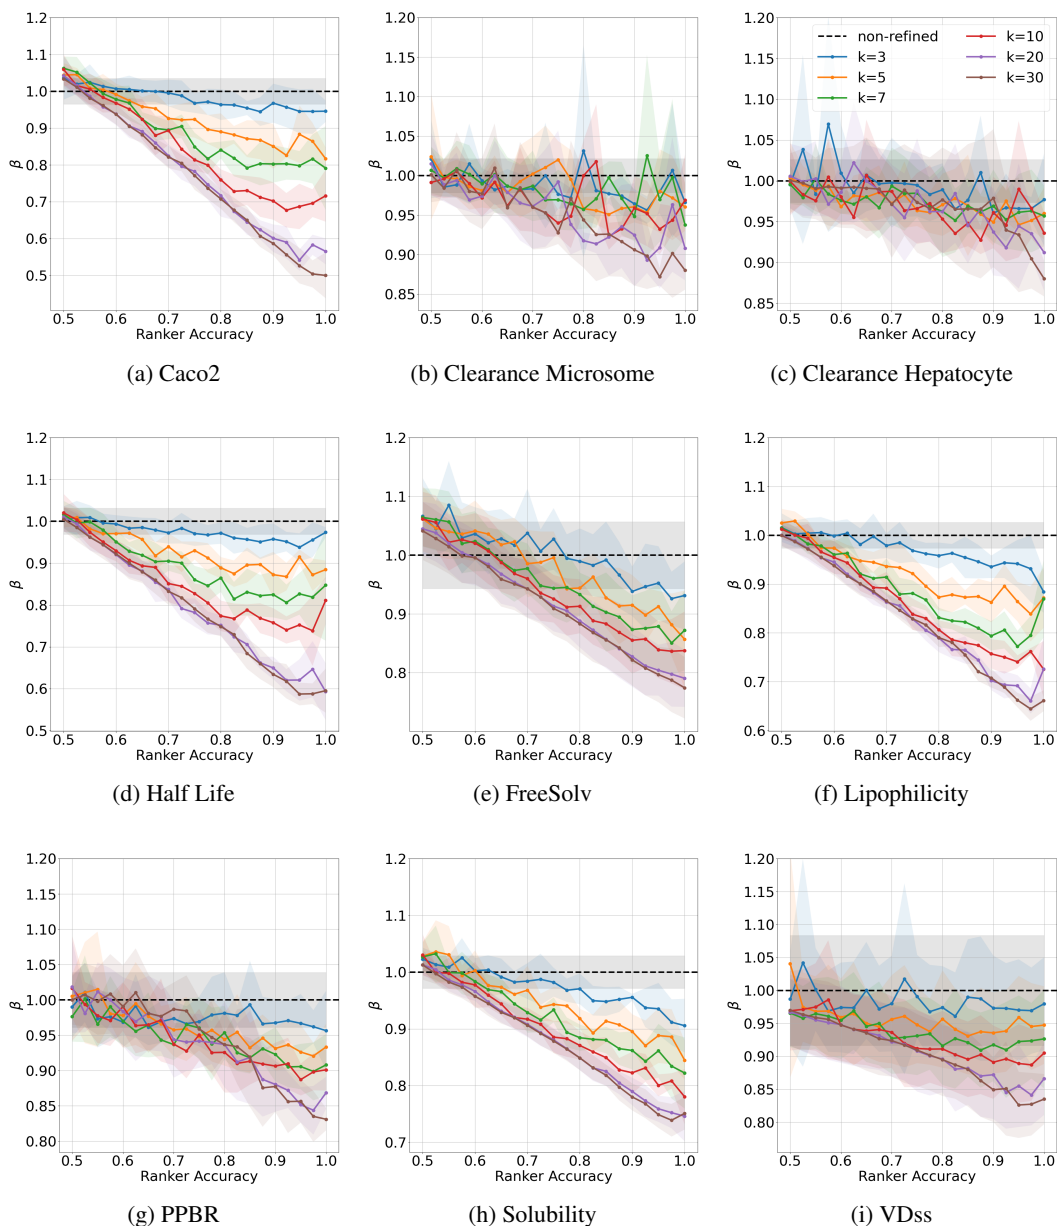

Figure 3: Performance of RankRefine on molecular property prediction datasets under varying oracle ranker accuracy and number of reference comparisons. Each plot shows the normalized error  $\beta = \frac{\text{MAE}_{\text{post}}}{\text{MAE}_{\text{reg}}}$  as a function of ranker accuracy, averaged over 5 random splits.  $\beta < 1$  indicates improvements in regression performance over the base regressor.  $k$  is the number of pairwise comparisons for each test molecule. Shaded regions indicate standard deviation. Dashed gray line shows baseline MAE with no refinement. Across most configurations, RankRefine improves regression performance when using a ranker with accuracy as low as 0.55. Increasing  $k$  tends to lower  $\beta$ , but typically the benefits start to diminish beyond  $k = 20$ .

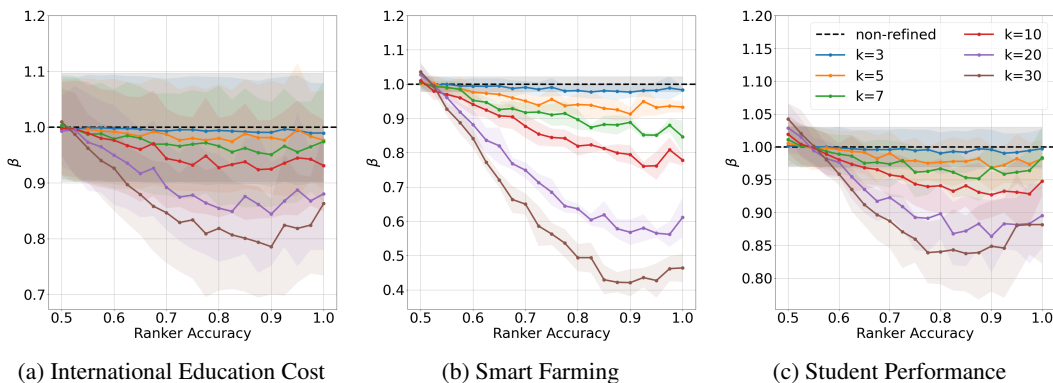

Figure 4: Performance of RankRefine on tabular datasets under varying oracle ranker accuracy and number of reference comparisons. Across most configurations, RankRefine improves regression performance when using a ranker with accuracy as low as 0.55.

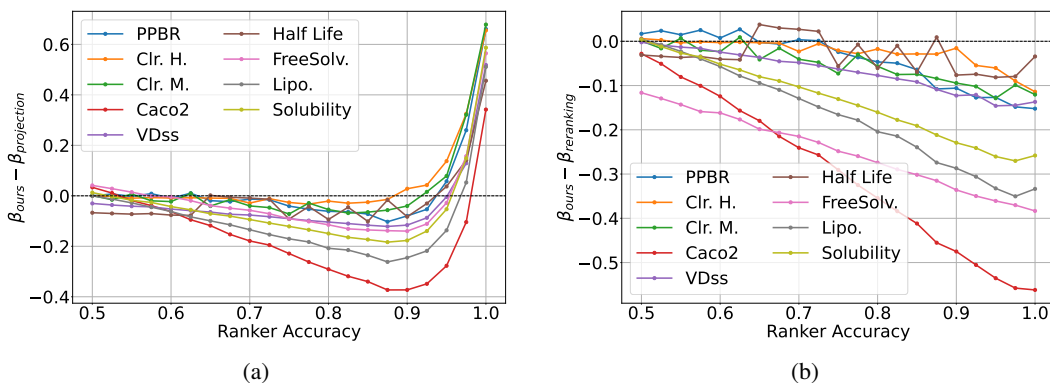

Figure 5: (a) Comparison between RankRefine the constrained optimization (projection)-based refinement method of Yan et al. [2024] on molecular property prediction tasks. We report the difference in normalized error,  $\beta_{\text{ours}} - \beta_{\text{projection}}$ . A negative value indicates better performance by RankRefine. Each curve corresponds to a dataset. RankRefine generally outperforms the baseline when the ranker accuracy is between 0.5 and 0.95. (b) We also compare our method to a related post hoc regression improvement method, regression by re-ranking [Gonçalves et al., 2023].

when ranker accuracy lies between 0.50 and 0.95; projection dominates only when the ranker is nearly perfect. This is because, when all pairwise rankings are correct, the projection method strictly enforces the constraints without increasing the absolute error. In such cases, the MAE will either remain unchanged or improved, with the improvements depend primarily on the distribution and resolution of the known labels. Yet, such near-perfect rankers are rare in real-world scenarios. Thus, the robust performance of RankRefine with moderately-accurate rankers offers more practicality. More comparisons with projection-based refinement can be found in the supplementary materials.

#### 4.6 Few-Shot Molecular-Property Prediction with LLMs

To evaluate the practical applicability of RankRefine in realistic few-shot settings, we replace the oracle ranker with ChatGPT-4o [OpenAI, 2025], a large language model (LLM). Note that we can still evaluate the ranking accuracy of the LLM through oracle for the purpose of analysis. For each test molecule, we randomly sample 20 reference molecules from the training set and ask ChatGPT-4o to perform pairwise comparisons (e.g., “Which molecule is likely to have higher solubility?”). The model is queried using textual molecular descriptions, SMILES Weininger [1988]. The details of the prompt is provided in the supplementary materials.

Table 1: PRA and resulting RankRefine performance using ChatGPT-4o as the ranker on six datasets from the TDC ADME benchmark. For each test molecule, 20 training molecules are randomly sampled to form pairwise comparisons. Values are averaged over 3 random splits. Despite moderate pairwise accuracy ( $\sim 0.60$ – $0.69$ ), RankRefine consistently improves regression performance, demonstrating the viability of LLM-based rankers in low-data domains.

|                           | Dataset | Lipophilicity     | Solubility        | VDss              |
|---------------------------|---------|-------------------|-------------------|-------------------|
| Pairwise Ranking Accuracy |         | $0.622 \pm 0.008$ | $0.693 \pm 0.035$ | $0.605 \pm 0.010$ |
| $\beta$                   |         | $0.957 \pm 0.012$ | $0.934 \pm 0.048$ | $0.895 \pm 0.530$ |
|                           | Dataset | Caco2             | Half Life         | FreeSolv          |
| Pairwise Ranking Accuracy |         | $0.660 \pm 0.013$ | $0.602 \pm 0.014$ | $0.681 \pm 0.050$ |
| $\beta$                   |         | $0.970 \pm 0.027$ | $0.971 \pm 0.005$ | $0.937 \pm 0.012$ |

Table 2: Performance of RankRefine when using human participants as both direct estimators and pairwise rankers on a facial age estimation task. The base error ( $\text{MAE}_{\text{reg}}$ ) corresponds to the raw human estimate error. Each test face is compared to 15 reference faces via human-judged pairwise comparisons. RankRefine improves prediction accuracy by refining each estimate based on human-provided rankings.

| $\text{MAE}_{\text{reg}}$ | Pairwise Ranking Acc. | $\beta$           |
|---------------------------|-----------------------|-------------------|
| $6.343 \pm 0.610$         | $0.759 \pm 0.052$     | $0.954 \pm 0.046$ |

Table 1 summarizes ChatGPT-4o ranking accuracy and the resulting  $\beta$  on six TDC datasets. Even moderate accuracies ( $\approx 0.62$ – $0.69$ ) yield tangible MAE gains, underscoring both the robustness and practicality of our method.

#### 4.7 Human Age Estimation with Pairwise Self-Correction

RankRefine can potentially be used in an interactive, human-in-the-loop scenarios, where domain experts act as the pairwise rankers. As a proof of concept, we conduct a user study on the age estimation task. Details about the user study is available in the supplementary materials.

Table 2 reports a UTKFace user study where 6 participants are asked to: (1) estimate the age of 17 individuals from their corresponding pictures, and (2) perform pairwise judgments to 15 individuals in the reference set. Pairwise judgments raise ranking accuracy to 0.76 and cut MAE by  $\approx 5\%$ , illustrating RankRefine’s value for expert self-correction.

#### 4.8 Effects of Noisy Variance Estimates

We study the effect of noise in the ranker variance estimate on the Solubility dataset using  $k = 30$  and  $k = 40$ . We add uniform perturbations sampled from  $[-b, +b]$  to the estimated ranker variance before fusion. As shown in Figure 6, performance degradation becomes noticeable when  $b \geq 5$ , which is more than three times the standard deviations of the ranker variance estimates. For reference, the mean and standard deviation of the estimated ranker variance are  $2.358 \pm 1.079$ .

## 5 Limitations

While RankRefine demonstrates strong empirical performance, it has a number of limitations:

- Our theoretical analysis assumes that both the regressor and rank-based estimates have unbiased, Gaussian-distributed errors and are independent. Despite the empirical robustness

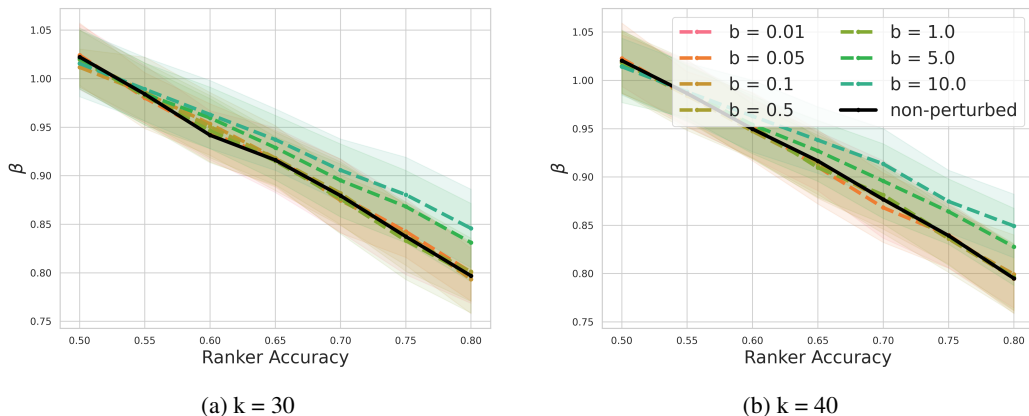

Figure 6: Impact of noisy ranker variance estimate on the regression performance in Caco2 dataset. Uniform noise from  $[-b, +b]$  is added to the estimated ranker variance. Performance starts to degrade when  $b \geq 5$ , more than 3 times the standard deviation of the ranker variance estimate.

of our method, its assumptions may not hold in practice, particularly in the presence of heavy-tailed or skewed noise.

- RankRefine depends on well-calibrated uncertainty estimates from the regressor and a trustworthy estimate of ranker variance (via Equation 3). Miscalibration in either component can reduce or even negate the performance gains.
- Our oracle experiments assume uniformly random ranking errors; however, real-world rankers may exhibit systematic biases, for example consistently failing on extreme values which can skew the fusion process.
- RankRefine uses the Bradley–Terry model by treating true property values as proxies for latent scores, which differs from its original use where latent scores are learned to explain probabilistic pairwise outcomes. While practical, this introduces a modeling mismatch. A possible solution is to learn a mapping from a standard Bradley-Terry latent scores to labels on a holdout set and apply it during inference

## 6 Future Work

Future work can extend RankRefine in several promising directions. One avenue is to replace the Bradley-Terry likelihood with richer stochastic-transitivity models that better capture structured or systematic errors in the ranker. Another important direction involves incorporating Bayesian or conformal calibration layers to automatically correct misestimated variances and improve reliability. Beyond scalar predictions, RankRefine could potentially be extended to handle multivariate or structured targets, such as full pharmacokinetic profiles. Finally, leveraging rationale from language models could improve the interpretability of the ranking process and facilitate richer forms of expert feedback in decision-critical domains.

## 7 Conclusion

We introduced RankRefine, a plug-and-play, post hoc framework that injects pairwise-ranking signals into any uncertainty-aware regressor. Theoretically, we proved that inverse-variance fusion with a rank-based estimator lowers the expected mean absolute error (MAE) whenever the ranker variance is finite. Empirically, oracle simulations generally follow the theory, and experiments on nine molecular-property benchmarks plus three diverse tabular tasks showed consistent improvements even with ranker accuracies of around 55% and as few as 10 comparisons. ChatGPT-4o rankings yielded measurable MAE drops on six ADME datasets, and a user study demonstrated similar self-correction for human age estimation. Compared with a projection baseline, RankRefine prevailed whenever ranker accuracy lay in the realistic 0.50–0.95 range, underscoring its robustness and broad applicability.

## 240 A Extended Proof

### 241 A.1 RankRefine is a minimum-variance unbiased estimator

242 Suppose that we have two independent unbiased estimates of the same parameter  $y_0$ ,

$$\hat{y}_0^{\text{reg}} \sim \mathcal{N}(y_0, \sigma_{\text{reg}}^2), \quad \hat{y}_0^{\text{rank}} \sim \mathcal{N}(y_0, \sigma_{\text{rank}}^2),$$

243 and we want to form a linear combination of the two estimates,

$$\hat{y}_0^* = w\hat{y}_0^{\text{reg}} + (1-w)\hat{y}_0^{\text{rank}}, \quad (5)$$

244 our goal is to choose  $w \in [0, 1]$  such that the variance is minimized.

245 For two independent random variables  $X$  and  $Y$ ,  $\text{Var}(aX + bY) = a^2X + b^2Y$ . The post-fusion  
246 variance of the unbiased estimates is then,

$$\sigma_{\text{post}}^2 = w^2\sigma_{\text{reg}}^2 + (1-w)^2\sigma_{\text{rank}}^2. \quad (6)$$

247 To minimize  $\sigma_{\text{post}}^2$  with respect to  $w$ , we take the derivative and solve for,

$$\begin{aligned} \frac{d}{dw}(w^2\sigma_{\text{reg}}^2 + (1-w)^2\sigma_{\text{rank}}^2) &= 0, \\ 2w\sigma_{\text{reg}}^2 - 2(1-w)\sigma_{\text{rank}}^2 &= 0 \\ 2w\sigma_{\text{reg}}^2 &= 2(1-w)\sigma_{\text{rank}}^2 \\ w\sigma_{\text{reg}}^2 &= (1-w)\sigma_{\text{rank}}^2 \\ w\sigma_{\text{reg}}^2 &= \sigma_{\text{rank}}^2 - w\sigma_{\text{rank}}^2 \\ w\sigma_{\text{reg}}^2 + w\sigma_{\text{rank}}^2 &= \sigma_{\text{rank}}^2 \\ w(\sigma_{\text{reg}}^2 + \sigma_{\text{rank}}^2) &= \sigma_{\text{rank}}^2. \end{aligned} \quad (7)$$

248 Therefore,

$$w = \frac{\sigma_{\text{rank}}^2}{\sigma_{\text{reg}}^2 + \sigma_{\text{rank}}^2}, \quad (1-w) = \frac{\sigma_{\text{reg}}^2}{\sigma_{\text{reg}}^2 + \sigma_{\text{rank}}^2}. \quad (8)$$

249 Substituting the weights in Equation 6 with Equation 8, we obtain the RankRefine post-fusion  
250 variance in Equation 1,

$$\begin{aligned} \sigma_{\text{post}}^2 &= \left( \frac{\sigma_{\text{rank}}^2}{\sigma_{\text{reg}}^2 + \sigma_{\text{rank}}^2} \right)^2 \sigma_{\text{reg}}^2 + \left( \frac{\sigma_{\text{reg}}^2}{\sigma_{\text{reg}}^2 + \sigma_{\text{rank}}^2} \right)^2 \sigma_{\text{rank}}^2 \\ &= \frac{(\sigma_{\text{rank}}^2)^2 \sigma_{\text{reg}}^2 + (\sigma_{\text{reg}}^2)^2 \sigma_{\text{rank}}^2}{(\sigma_{\text{reg}}^2 + \sigma_{\text{rank}}^2)^2} \\ &= \frac{\sigma_{\text{rank}}^2 \sigma_{\text{reg}}^2 (\sigma_{\text{rank}}^2 + \sigma_{\text{reg}}^2)}{(\sigma_{\text{reg}}^2 + \sigma_{\text{rank}}^2)^2} \\ &= \frac{\sigma_{\text{rank}}^2 \sigma_{\text{reg}}^2}{\sigma_{\text{rank}}^2 + \sigma_{\text{reg}}^2} \\ &= \left( \frac{1}{\sigma_{\text{reg}}^2} + \frac{1}{\sigma_{\text{rank}}^2} \right)^{-1} \end{aligned} \quad (9)$$

251 Similarly, substituting the weights in Equation 5 with Equation 8, we get the RankRefine estimate  
 252 in Equation 1,

$$\begin{aligned}
 \hat{y}_0^* &= \frac{\sigma_{\text{rank}}^2}{\sigma_{\text{reg}}^2 + \sigma_{\text{rank}}^2} \hat{y}_0^{\text{reg}} + \frac{\sigma_{\text{reg}}^2}{\sigma_{\text{reg}}^2 + \sigma_{\text{rank}}^2} \hat{y}_0^{\text{rank}} \\
 &= \frac{\sigma_{\text{rank}}^2 \sigma_{\text{reg}}^2}{(\sigma_{\text{reg}}^2 + \sigma_{\text{rank}}^2) \sigma_{\text{reg}}^2} \hat{y}_0^{\text{reg}} + \frac{\sigma_{\text{reg}}^2 \sigma_{\text{rank}}^2}{(\sigma_{\text{reg}}^2 + \sigma_{\text{rank}}^2) \sigma_{\text{rank}}^2} \hat{y}_0^{\text{rank}} \\
 &= \frac{\sigma_{\text{post}}^2}{\sigma_{\text{reg}}^2} \hat{y}_0^{\text{reg}} + \frac{\sigma_{\text{post}}^2}{\sigma_{\text{rank}}^2} \hat{y}_0^{\text{rank}} \\
 &= \sigma_{\text{post}}^2 \left( \frac{\hat{y}_0^{\text{reg}}}{\sigma_{\text{reg}}^2} + \frac{\hat{y}_0^{\text{rank}}}{\sigma_{\text{rank}}^2} \right)
 \end{aligned} \tag{10}$$

## 253 A.2 Analysis of RankRefine

254 Corollary 3.2.1 is obtained from:

$$\begin{aligned}
 \sigma_{\text{post}}^2 < \sigma_{\text{reg}}^2 &\iff \left( \frac{1}{\sigma_{\text{reg}}^2} + \frac{1}{\sigma_{\text{rank}}^2} \right)^{-1} < \sigma_{\text{reg}}^2, \\
 &\iff \frac{1}{\sigma_{\text{reg}}^2} + \frac{1}{\sigma_{\text{rank}}^2} > \frac{1}{\sigma_{\text{reg}}^2}, \\
 &\iff \frac{1}{\sigma_{\text{rank}}^2} < 0, \\
 &\iff \sigma_{\text{rank}}^2 < \infty.
 \end{aligned} \tag{11}$$

255 For an unbiased Gaussian estimates  $\hat{y}_0 \sim \mathcal{N}(y_0, \sigma^2)$ , the expected error is,

$$\begin{aligned}
 \mathbb{E}(|\hat{y}_0 - y_0|) &= \mathbb{E}(|y_0 + \epsilon - y_0|), \quad \text{with } \epsilon \sim \mathcal{N}(0, \sigma^2) \\
 &= \mathbb{E}(|\epsilon|).
 \end{aligned} \tag{12}$$

256 Since  $\epsilon$  is a Gaussian distribution, then  $|\epsilon|$  follows the half-Gaussian distribution with an expected  
 257 value equals to  $\sqrt{2/\pi}\sigma$ . The subsequent  $\beta$  bound in Equation 4 is obtained from:

$$\begin{aligned}
 \text{MAE}_{\text{post}} \leq \beta \text{MAE}_{\text{reg}} &\iff \sigma_{\text{post}} \leq \beta \sigma_{\text{reg}}, \\
 &\iff \sigma_{\text{post}}^2 \leq \beta^2 \sigma_{\text{reg}}^2, \\
 &\iff \left( \frac{1}{\sigma_{\text{reg}}^2} + \frac{1}{\sigma_{\text{rank}}^2} \right)^{-1} \leq \beta^2 \sigma_{\text{reg}}^2 \\
 &\iff \frac{1}{\sigma_{\text{reg}}^2} + \frac{1}{\sigma_{\text{rank}}^2} \geq \frac{1}{\beta^2 \sigma_{\text{reg}}^2} \\
 &\iff \frac{1}{\sigma_{\text{rank}}^2} \geq \frac{1 - \beta^2}{\beta^2 \sigma_{\text{reg}}^2}, \\
 &\iff \sigma_{\text{rank}}^2 \leq \frac{\beta^2 \sigma_{\text{reg}}^2}{1 - \beta^2}
 \end{aligned} \tag{13}$$

## 258 B Additional Experimental Details

### 259 B.1 Prompt for obtaining pairwise rankings from ChatGPT-4o

260 We use the following prompt to query ChatGPT-4o to predict the pairwise rankings for the Lipophilic-  
 261 ity dataset.

262 # Identity

```

263
264 You are an expert in chemistry and biology. Given a short description of a
265 molecular property and two molecular SMILES, you can determine if Molecule A
266 has greater property value than Molecule B or not.
267
268 # Instructions
269
270 * The list of pairwise molecules is given in two CSV files: "test_A.csv" and
271 "test_B.csv". These are two different lists that you need to perform rank
272 prediction on. The first line is the header.
273 * You cannot use external cheminformatics library to directly predict the property.
274 * You can design your own heuristics, comparing atom types, bonds,
275 and other important information to make your predictions.
276 * Before you start designing the heuristics, briefly explain the property
277 and what influence its values. Incorporate this prior knowledge into your heuristic.
278 * You are given 5 examples in the prompt. Make sure your heuristics in
279 general is aligned with the given examples. Pay attention to the examples,
280 especially because some properties have greater effects when its values are lower.
281 * You should output CSV files titled "test_pred_A.csv" and "test_pred_B".
282 The header is "molecule_a, molecule_b, is_a_greater".
283 * Only output 0 or 1 for "is_a_greater". 0 means that the property value of
284 molecule A is less than that of Molecule B. 1 means that the property value of
285 molecule A is greater than that of Molecule B
286 * In addition to the output CSV file, you should output the first and last
287 molecule pairs, in both CSV A and CSV B, to the chat. Briefly explain your
288 answer for these three molecule pairs.
289
290 # Examples
291
292 <user_query>
293 The property of interest is lipophilicity, the ability of a drug to dissolve in a
294 lipid (e.g. fats, oils) environment.
295 Examples:
296 CC(C)Cn1c(=O)n(C)c(=O)c2c(C(=O)N3CC[C@@H](O)C3)c(OC3cccc4cccc34)sc21,
297 CC(C)(C(=O)O)c1ccc(C(O)CCCN2CCC(C(O)(c3cccc3)c3cccc3)CC2)cc1,
298 1
299 O=C(Nc1cccc1Cl)c1cc[nH]n1,
300 O=C(Nc1ccc(Nc2ccc(NC(=O)c3cccc3)c3c2C(=O)c2cccc2C3=O)c2c1C(=O)c1cccc1C2=O)c1cccc1,
301 0
302 Cn1c2cccc2c2cc(NC(=O)CCc3ccncc3)ccc21,
303 Cc1cc(OC(=O)C(C)=O)cc(C)c1-c1cccc(COc2ccc3c(c2)OC[C@H]3CC(=O)O)c1,
304 1
305 Cc1ccnc2nc(C(=O)Nc3nccs3)nn12,
306 Cc1cc(OC(=O)C(C)=O)cc(C)c1-c1cccc(COc2ccc3c(c2)OC[C@H]3CC(=O)O)c1,
307 0
308 O=C(NCc1ccc(OC(F)(F)F)cc1)C1c2cccc2C(=O)N1CC1CC(F)(F)C1,
309 COCCCOc1ccnc(C[S+])([O-])c2nc3cccc3[nH]2)c1C,
310 1
311 </user_query>

```

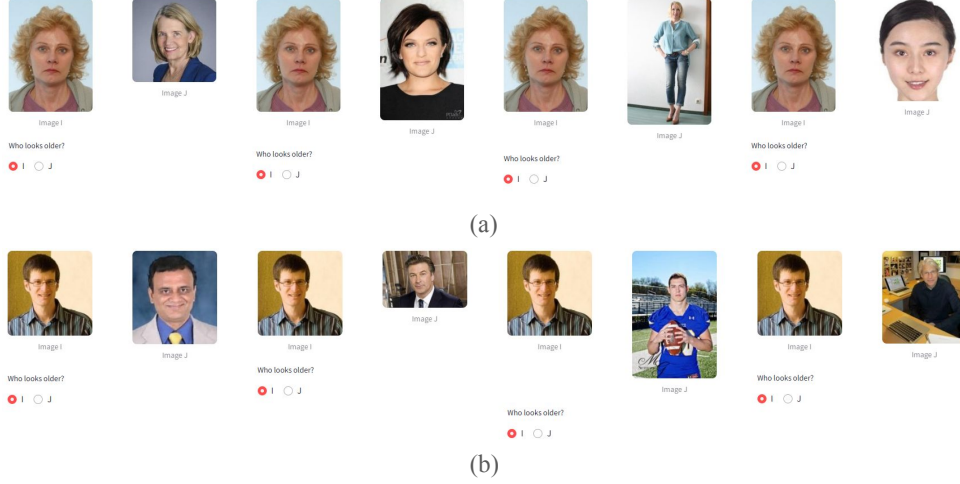

Figure 7: Partial interface used in the user study. Participants first estimate the age of each test individual, then make pairwise judgments on who appears older between the test individual and reference individuals of the same UTKFace gender label.

## B.2 User Study

The user study uses age estimation on the UTKFace dataset as a regression task. Six participants estimate the ages of 17 individuals from facial images. Each test individual is then paired with 15 disjoint reference individuals, and participants judge who appears older in each pair based solely on facial appearance. To prevent fatigue, the total number of comparisons is limited to  $17 \times 15 = 255$ . A screenshot of the Streamlit app used in the study is shown in Figure 7.

## C More Comparisons with the Projection-based Approach

Figure 8 highlights how performance varies between RankRefine and the projection-based approach as the number of reference samples increases. While the projection-based method benefits from high-accuracy rankers or minimal references, RankRefine demonstrates stronger robustness in lower-accuracy regimes, particularly as the number of reference samples  $k$  increases.

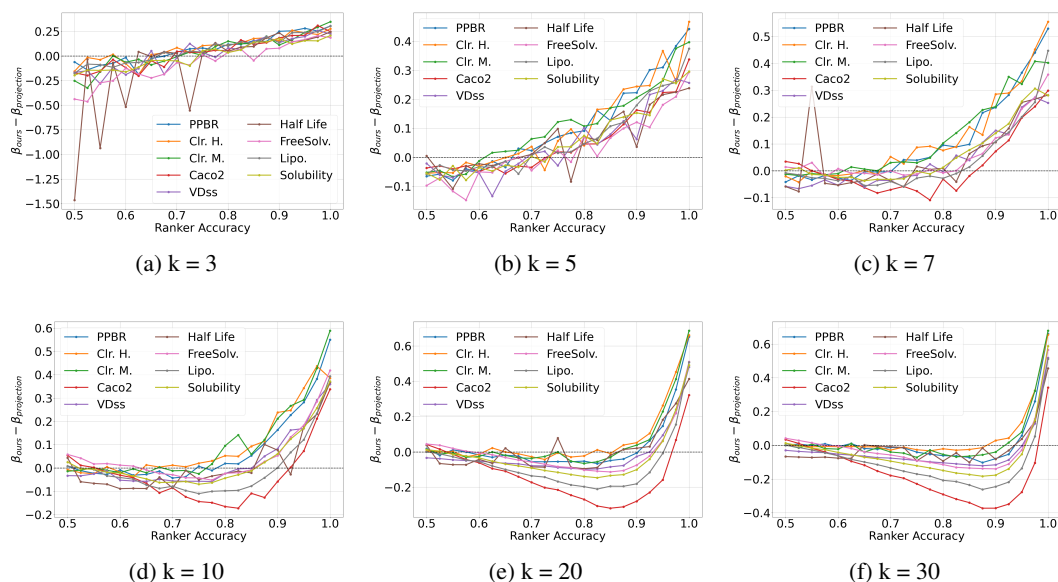

Figure 8: Comparison of RankRefine and the projection-based approach across varying reference sample sizes  $k$ . The projection-based method performs better with high ranker accuracy or very few references, while RankRefine excels when accuracy is below 70% for  $k = 7$ , 80% for  $k = 10$ , 90% for  $k = 20$ , and 95% for  $k = 30$ . Since RankRefine can leverage general-purpose LLMs, collecting more pairwise rankings can be done efficiently as long as the reference set is sufficiently large.

## References

- Michael Sun, Minghao Guo, Weize Yuan, Veronika Thost, Crystal Elaine Owens, Aristotle Franklin Grosz, Sharvaa Selvan, Katelyn Zhou, Hassan Mohiuddin, Benjamin J Pedretti, et al. Representing molecules as random walks over interpretable grammars. In *International Conference on Machine Learning*, pages 46988–47016. PMLR, 2024.
- Michael Sun, Gang Liu, Weize Yuan, Wojciech Matusik, and Jie Chen. Foundation molecular grammar: Multi-modal foundation models induce interpretable molecular graph languages. In *International Conference on Machine Learning*. PMLR, 2025.
- Taicheng Guo, Bozhao Nan, Zhenwen Liang, Zhichun Guo, Nitesh Chawla, Olaf Wiest, Xiangliang Zhang, et al. What can large language models do in chemistry? a comprehensive benchmark on eight tasks. *Advances in Neural Information Processing Systems*, 36:59662–59688, 2023.
- Pin-Yen Huang, Szu-Wei Fu, and Yu Tsao. Rankup: Boosting semi-supervised regression with an auxiliary ranking classifier. In *The Thirty-eighth Annual Conference on Neural Information Processing Systems*, 2024. URL <https://openreview.net/forum?id=d21PM1Aczs>.
- Michael Tynes, Wenhao Gao, Daniel J Burrill, Enrique R Batista, Danny Perez, Ping Yang, and Nicholas Lubbers. Pairwise difference regression: a machine learning meta-algorithm for improved prediction and uncertainty quantification in chemical search. *Journal of chemical information and modeling*, 61(8):3846–3857, 2021.
- Zachary Fralish, Ashley Chen, Paul Skaluba, and Daniel Reker. Deepdelta: predicting admet improvements of molecular derivatives with deep learning. *Journal of cheminformatics*, 15(1):101, 2023.
- Filipe Marcel Fernandes Gonçalves, Daniel Carlos Guimarães Pedronette, and Ricardo da Silva Torres. Regression by re-ranking. *Pattern Recognition*, 140:109577, 2023.
- Le Yan, Zhen Qin, Honglei Zhuang, Rolf Jagerman, Xuanhui Wang, Michael Bendersky, and Harrie Oosterhuis. Consolidating ranking and relevance predictions of large language models through post-

- processing. In *Proceedings of the 2024 Conference on Empirical Methods in Natural Language Processing*, pages 410–423, 2024.
- Wei Chu and Zoubin Ghahramani. Preference learning with gaussian processes. In *Proceedings of the 22nd international conference on Machine learning*, pages 137–144, 2005.
- Neil Houlsby, Ferenc Huszar, Zoubin Ghahramani, and Jose Hernández-Ibáñez. Collaborative gaussian processes for preference learning. *Advances in neural information processing systems*, 25, 2012.
- Siu Lun Chau, Javier Gonzalez, and Dino Sejdinovic. Learning inconsistent preferences with gaussian processes. In *International Conference on Artificial Intelligence and Statistics*, pages 2266–2281. PMLR, 2022.
- Chris Burges, Tal Shaked, Erin Renshaw, Ari Lazier, Matt Deeds, Nicole Hamilton, and Greg Hullender. Learning to rank using gradient descent. In *Proceedings of the 22nd international conference on Machine learning*, pages 89–96, 2005.
- Ilkay Yildiz, Jennifer Dy, Deniz Erdogmus, Jayashree Kalpathy-Cramer, Susan Ostmo, J Peter Campbell, Michael F Chiang, and Stratis Ioannidis. Fast and accurate ranking regression. In *International Conference on Artificial Intelligence and Statistics*, pages 77–88. PMLR, 2020.
- Gary Tom, Stanley Lo, Samantha Corapi, Alan Aspuru-Guzik, and Benjamin Sanchez-Lengeling. Ranking over regression for bayesian optimization and molecule selection. *arXiv preprint arXiv:2410.09290*, 2024.
- Kevin Maik Jablonka, Philippe Schwaller, Andres Ortega-Guerrero, and Berend Smit. Leveraging large language models for predictive chemistry. *Nature Machine Intelligence*, 6(2):161–169, 2024.
- Zikai Xie, Xenophon Evangelopoulos, Ömer H Omar, Alessandro Troisi, Andrew I Cooper, and Linjiang Chen. Fine-tuning gpt-3 for machine learning electronic and functional properties of organic molecules. *Chemical science*, 15(2):500–510, 2024.
- Ryan Jacobs, Maciej P Polak, Lane E Schultz, Hamed Mahdavi, Vasant Honavar, and Dane Morgan. Regression with large language models for materials and molecular property prediction. *arXiv preprint arXiv:2409.06080*, 2024.
- Yuyan Liu, Sirui Ding, Sheng Zhou, Wenqi Fan, and Qiaoyu Tan. Moleculargpt: Open large language model (llm) for few-shot molecular property prediction. *arXiv preprint arXiv:2406.12950*, 2024.
- LL Thurstone. A law of comparative judgment. *Psychological Review*, 34(4), 1927.
- George A Miller. The magical number seven, plus or minus two: Some limits on our capacity for processing information. *Psychological review*, 63(2):81, 1956.
- Neil Stewart, Gordon DA Brown, and Nick Chater. Absolute identification by relative judgment. *Psychological review*, 112(4):881, 2005.
- Jennifer Routh, Sharmini Julita Paramasivam, Peter Cockcroft, Sarah Wood, John Remnant, Cornélie Westermann, Alison Reid, Patricia Pawson, Sheena Warman, Vishna Devi Nadarajah, et al. Rating and ranking preparedness characteristics important for veterinary workplace clinical training: a novel application of pairwise comparisons and the elo algorithm. *Frontiers in Medicine*, 10: 1128058, 2023.
- Eva JI Hoeijmakers, Bibi Martens, Babs MF Hendriks, Casper Muhl, Razvan L Miclea, Walter H Backes, Joachim E Wildberger, Frank M Zijta, Hester A Gietema, Patricia J Nelemans, et al. How subjective ct image quality assessment becomes surprisingly reliable: pairwise comparisons instead of likert scale. *European Radiology*, 34(7):4494–4503, 2024.
- Shengyu Zhang, Linfeng Dong, Xiaoya Li, Sen Zhang, Xiaofei Sun, Shuhe Wang, Jiwei Li, Runyi Hu, Tianwei Zhang, Fei Wu, et al. Instruction tuning for large language models: A survey. *arXiv preprint arXiv:2308.10792*, 2023.

- 394 Yuntao Bai, Andy Jones, Kamal Ndousse, Amanda Askell, Anna Chen, Nova DasSarma, Dawn Drain,  
395 Stanislav Fort, Deep Ganguli, Tom Henighan, et al. Training a helpful and harmless assistant with  
396 reinforcement learning from human feedback. *arXiv preprint arXiv:2204.05862*, 2022.
- 397 Rafael Rafailov, Archit Sharma, Eric Mitchell, Christopher D Manning, Stefano Ermon, and Chelsea  
398 Finn. Direct preference optimization: Your language model is secretly a reward model. *Advances*  
399 *in Neural Information Processing Systems*, 36:53728–53741, 2023.
- 400 William G Cochran and Sarah Porter Carroll. A sampling investigation of the efficiency of weighting  
401 inversely as the estimated variance. *Biometrics*, 9(4):447–459, 1953.
- 402 Ralph Allan Bradley and Milton E Terry. Rank analysis of incomplete block designs: I. the method  
403 of paired comparisons. *Biometrika*, 39(3/4):324–345, 1952.
- 404 Alexander Ly, Maarten Marsman, Josine Verhagen, Raoul PPP Grasman, and Eric-Jan Wagenmakers.  
405 A tutorial on fisher information. *Journal of Mathematical Psychology*, 80:40–55, 2017.
- 406 Kexin Huang, Tianfan Fu, Wenhao Gao, Yue Zhao, Yusuf Roohani, Jure Leskovec, Connor Coley,  
407 Cao Xiao, Jimeng Sun, and Marinka Zitnik. Therapeutics data commons: Machine learning  
408 datasets and tasks for drug discovery and development. *Advances in neural information processing*  
409 *systems*, 2021.
- 410 Ning-Ning Wang, Jie Dong, Yin-Hua Deng, Min-Feng Zhu, Ming Wen, Zhi-Jiang Yao, Ai-Ping Lu,  
411 Jian-Bing Wang, and Dong-Sheng Cao. Adme properties evaluation in drug discovery: prediction  
412 of caco-2 cell permeability using a combination of nsga-ii and boosting. *Journal of chemical*  
413 *information and modeling*, 56(4):763–773, 2016.
- 414 Li Di, Christopher Keefer, Dennis O Scott, Timothy J Strelevitz, George Chang, Yi-An Bi, Yurong  
415 Lai, Jonathon Duckworth, Katherine Fenner, Matthew D Troutman, et al. Mechanistic insights  
416 from comparing intrinsic clearance values between human liver microsomes and hepatocytes to  
417 guide drug design. *European journal of medicinal chemistry*, 57:441–448, 2012.
- 418 R Scott Obach, Franco Lombardo, and Nigel J Waters. Trend analysis of a database of intravenous  
419 pharmacokinetic parameters in humans for 670 drug compounds. *Drug Metabolism and Disposi-*  
420 *tion*, 36(7):1385–1405, 2008.
- 421 David L Mobley and J Peter Guthrie. Freesolv: a database of experimental and calculated hydration  
422 free energies, with input files. *Journal of computer-aided molecular design*, 28:711–720, 2014.
- 423 Zhenqin Wu, Bharath Ramsundar, Evan N Feinberg, Joseph Gomes, Caleb Geniesse, Aneesh S  
424 Pappu, Karl Leswing, and Vijay Pande. Moleculenet: a benchmark for molecular machine learning.  
425 *Chemical science*, 9(2):513–530, 2018.
- 426 Murat Cihan Sorkun, Abhishek Khetan, and Süleyman Er. Aqsolddb, a curated reference set of  
427 aqueous solubility and 2d descriptors for a diverse set of compounds. *Scientific data*, 6(1):143,  
428 2019.
- 429 Franco Lombardo and Yankang Jing. In silico prediction of volume of distribution in humans.  
430 extensive data set and the exploration of linear and nonlinear methods coupled with molecular  
431 interaction fields descriptors. *Journal of chemical information and modeling*, 56(10):2042–2052,  
432 2016.
- 433 Atharva Soundankar. Smart farming sensor data for yield prediction,  
434 2025. URL [https://www.kaggle.com/datasets/atharvasoundankar/](https://www.kaggle.com/datasets/atharvasoundankar/smart-farming-sensor-data-for-yield-prediction)  
435 [smart-farming-sensor-data-for-yield-prediction](https://www.kaggle.com/datasets/atharvasoundankar/smart-farming-sensor-data-for-yield-prediction).
- 436 Paulo Cortez. Student Performance. UCI Machine Learning Repository, 2014.
- 437 Adil Shamim. Cost of international education, 2025. URL [https://www.kaggle.com/datasets/](https://www.kaggle.com/datasets/adilshamim8/cost-of-international-education)  
438 [adilshamim8/cost-of-international-education](https://www.kaggle.com/datasets/adilshamim8/cost-of-international-education).
- 439 Zhifei Zhang, Yang Song, and Hairong Qi. Age progression/regression by conditional adversarial  
440 autoencoder. In *Proceedings of the IEEE conference on computer vision and pattern recognition*,  
441 pages 5810–5818, 2017.

442 Fabian Pedregosa, Gaël Varoquaux, Alexandre Gramfort, Vincent Michel, Bertrand Thirion, Olivier  
443 Grisel, Mathieu Blondel, Peter Prettenhofer, Ron Weiss, Vincent Dubourg, et al. Scikit-learn:  
444 Machine learning in python. *the Journal of machine Learning research*, 12:2825–2830, 2011.

445 OpenAI. Chatgpt-4o, 2025. URL <https://chatgpt.com/>.

446 David Weininger. Smiles, a chemical language and information system. 1. introduction to methodol-  
447 ogy and encoding rules. *Journal of chemical information and computer sciences*, 28(1):31–36,  
448 1988.

## NeurIPS Paper Checklist

### 1. Claims

Question: Do the main claims made in the abstract and introduction accurately reflect the paper's contributions and scope?

Answer: [\[Yes\]](#)

Justification: The claims made in the abstract and introduction accurately reflects the paper's contributions and scope.

Guidelines:

- The answer NA means that the abstract and introduction do not include the claims made in the paper.
- The abstract and/or introduction should clearly state the claims made, including the contributions made in the paper and important assumptions and limitations. A No or NA answer to this question will not be perceived well by the reviewers.
- The claims made should match theoretical and experimental results, and reflect how much the results can be expected to generalize to other settings.
- It is fine to include aspirational goals as motivation as long as it is clear that these goals are not attained by the paper.

### 2. Limitations

Question: Does the paper discuss the limitations of the work performed by the authors?

Answer: [\[Yes\]](#)

Justification: Limitations are discussed in a separate section.

Guidelines:

- The answer NA means that the paper has no limitation while the answer No means that the paper has limitations, but those are not discussed in the paper.
- The authors are encouraged to create a separate "Limitations" section in their paper.
- The paper should point out any strong assumptions and how robust the results are to violations of these assumptions (e.g., independence assumptions, noiseless settings, model well-specification, asymptotic approximations only holding locally). The authors should reflect on how these assumptions might be violated in practice and what the implications would be.
- The authors should reflect on the scope of the claims made, e.g., if the approach was only tested on a few datasets or with a few runs. In general, empirical results often depend on implicit assumptions, which should be articulated.
- The authors should reflect on the factors that influence the performance of the approach. For example, a facial recognition algorithm may perform poorly when image resolution is low or images are taken in low lighting. Or a speech-to-text system might not be used reliably to provide closed captions for online lectures because it fails to handle technical jargon.
- The authors should discuss the computational efficiency of the proposed algorithms and how they scale with dataset size.
- If applicable, the authors should discuss possible limitations of their approach to address problems of privacy and fairness.
- While the authors might fear that complete honesty about limitations might be used by reviewers as grounds for rejection, a worse outcome might be that reviewers discover limitations that aren't acknowledged in the paper. The authors should use their best judgment and recognize that individual actions in favor of transparency play an important role in developing norms that preserve the integrity of the community. Reviewers will be specifically instructed to not penalize honesty concerning limitations.

### 3. Theory assumptions and proofs

Question: For each theoretical result, does the paper provide the full set of assumptions and a complete (and correct) proof?

Answer: [\[Yes\]](#)

Justification: Assumptions and proofs are provided in the Method section.

Guidelines:

- The answer NA means that the paper does not include theoretical results.
- All the theorems, formulas, and proofs in the paper should be numbered and cross-referenced.
- All assumptions should be clearly stated or referenced in the statement of any theorems.
- The proofs can either appear in the main paper or the supplemental material, but if they appear in the supplemental material, the authors are encouraged to provide a short proof sketch to provide intuition.
- Inversely, any informal proof provided in the core of the paper should be complemented by formal proofs provided in appendix or supplemental material.
- Theorems and Lemmas that the proof relies upon should be properly referenced.

#### 4. Experimental result reproducibility

Question: Does the paper fully disclose all the information needed to reproduce the main experimental results of the paper to the extent that it affects the main claims and/or conclusions of the paper (regardless of whether the code and data are provided or not)?

Answer: [Yes]

Justification: Implementation details are provided in the Experimental Results section and Appendix.

Guidelines:

- The answer NA means that the paper does not include experiments.
- If the paper includes experiments, a No answer to this question will not be perceived well by the reviewers: Making the paper reproducible is important, regardless of whether the code and data are provided or not.
- If the contribution is a dataset and/or model, the authors should describe the steps taken to make their results reproducible or verifiable.
- Depending on the contribution, reproducibility can be accomplished in various ways. For example, if the contribution is a novel architecture, describing the architecture fully might suffice, or if the contribution is a specific model and empirical evaluation, it may be necessary to either make it possible for others to replicate the model with the same dataset, or provide access to the model. In general, releasing code and data is often one good way to accomplish this, but reproducibility can also be provided via detailed instructions for how to replicate the results, access to a hosted model (e.g., in the case of a large language model), releasing of a model checkpoint, or other means that are appropriate to the research performed.
- While NeurIPS does not require releasing code, the conference does require all submissions to provide some reasonable avenue for reproducibility, which may depend on the nature of the contribution. For example
  - (a) If the contribution is primarily a new algorithm, the paper should make it clear how to reproduce that algorithm.
  - (b) If the contribution is primarily a new model architecture, the paper should describe the architecture clearly and fully.
  - (c) If the contribution is a new model (e.g., a large language model), then there should either be a way to access this model for reproducing the results or a way to reproduce the model (e.g., with an open-source dataset or instructions for how to construct the dataset).
  - (d) We recognize that reproducibility may be tricky in some cases, in which case authors are welcome to describe the particular way they provide for reproducibility. In the case of closed-source models, it may be that access to the model is limited in some way (e.g., to registered users), but it should be possible for other researchers to have some path to reproducing or verifying the results.

#### 5. Open access to data and code

Question: Does the paper provide open access to the data and code, with sufficient instructions to faithfully reproduce the main experimental results, as described in supplemental material?

Answer: [Yes]

Justification: Code will be shared to the public upon publication.

Guidelines:

- The answer NA means that paper does not include experiments requiring code.
- Please see the NeurIPS code and data submission guidelines (<https://nips.cc/public/guides/CodeSubmissionPolicy>) for more details.
- While we encourage the release of code and data, we understand that this might not be possible, so “No” is an acceptable answer. Papers cannot be rejected simply for not including code, unless this is central to the contribution (e.g., for a new open-source benchmark).
- The instructions should contain the exact command and environment needed to run to reproduce the results. See the NeurIPS code and data submission guidelines (<https://nips.cc/public/guides/CodeSubmissionPolicy>) for more details.
- The authors should provide instructions on data access and preparation, including how to access the raw data, preprocessed data, intermediate data, and generated data, etc.
- The authors should provide scripts to reproduce all experimental results for the new proposed method and baselines. If only a subset of experiments are reproducible, they should state which ones are omitted from the script and why.
- At submission time, to preserve anonymity, the authors should release anonymized versions (if applicable).
- Providing as much information as possible in supplemental material (appended to the paper) is recommended, but including URLs to data and code is permitted.

## 6. Experimental setting/details

Question: Does the paper specify all the training and test details (e.g., data splits, hyper-parameters, how they were chosen, type of optimizer, etc.) necessary to understand the results?

Answer: [Yes]

Justification: Training and test details are described in the Experimental Results section and Appendix.

Guidelines:

- The answer NA means that the paper does not include experiments.
- The experimental setting should be presented in the core of the paper to a level of detail that is necessary to appreciate the results and make sense of them.
- The full details can be provided either with the code, in appendix, or as supplemental material.

## 7. Experiment statistical significance

Question: Does the paper report error bars suitably and correctly defined or other appropriate information about the statistical significance of the experiments?

Answer: [Yes]

Justification: The experimental results are supplemented with appropriate statistical information.

Guidelines:

- The answer NA means that the paper does not include experiments.
- The authors should answer "Yes" if the results are accompanied by error bars, confidence intervals, or statistical significance tests, at least for the experiments that support the main claims of the paper.
- The factors of variability that the error bars are capturing should be clearly stated (for example, train/test split, initialization, random drawing of some parameter, or overall run with given experimental conditions).
- The method for calculating the error bars should be explained (closed form formula, call to a library function, bootstrap, etc.)
- The assumptions made should be given (e.g., Normally distributed errors).

- It should be clear whether the error bar is the standard deviation or the standard error of the mean.
- It is OK to report 1-sigma error bars, but one should state it. The authors should preferably report a 2-sigma error bar than state that they have a 96% CI, if the hypothesis of Normality of errors is not verified.
- For asymmetric distributions, the authors should be careful not to show in tables or figures symmetric error bars that would yield results that are out of range (e.g. negative error rates).
- If error bars are reported in tables or plots, The authors should explain in the text how they were calculated and reference the corresponding figures or tables in the text.

## 8. Experiments compute resources

Question: For each experiment, does the paper provide sufficient information on the computer resources (type of compute workers, memory, time of execution) needed to reproduce the experiments?

Answer: [Yes]

Justification: Computer resources information is described in the Experimental Results section.

Guidelines:

- The answer NA means that the paper does not include experiments.
- The paper should indicate the type of compute workers CPU or GPU, internal cluster, or cloud provider, including relevant memory and storage.
- The paper should provide the amount of compute required for each of the individual experimental runs as well as estimate the total compute.
- The paper should disclose whether the full research project required more compute than the experiments reported in the paper (e.g., preliminary or failed experiments that didn't make it into the paper).

## 9. Code of ethics

Question: Does the research conducted in the paper conform, in every respect, with the NeurIPS Code of Ethics <https://neurips.cc/public/EthicsGuidelines>?

Answer: [Yes]

Justification: The research conducted in the paper conform the NeurIPS Code of Ethics.

Guidelines:

- The answer NA means that the authors have not reviewed the NeurIPS Code of Ethics.
- If the authors answer No, they should explain the special circumstances that require a deviation from the Code of Ethics.
- The authors should make sure to preserve anonymity (e.g., if there is a special consideration due to laws or regulations in their jurisdiction).

## 10. Broader impacts

Question: Does the paper discuss both potential positive societal impacts and negative societal impacts of the work performed?

Answer: [NA]

Justification: This work studies a generic post-hoc method for improving the performance of a regressor using pairwise ranking predictions.

Guidelines:

- The answer NA means that there is no societal impact of the work performed.
- If the authors answer NA or No, they should explain why their work has no societal impact or why the paper does not address societal impact.
- Examples of negative societal impacts include potential malicious or unintended uses (e.g., disinformation, generating fake profiles, surveillance), fairness considerations (e.g., deployment of technologies that could make decisions that unfairly impact specific groups), privacy considerations, and security considerations.

- The conference expects that many papers will be foundational research and not tied to particular applications, let alone deployments. However, if there is a direct path to any negative applications, the authors should point it out. For example, it is legitimate to point out that an improvement in the quality of generative models could be used to generate deepfakes for disinformation. On the other hand, it is not needed to point out that a generic algorithm for optimizing neural networks could enable people to train models that generate Deepfakes faster.
- The authors should consider possible harms that could arise when the technology is being used as intended and functioning correctly, harms that could arise when the technology is being used as intended but gives incorrect results, and harms following from (intentional or unintentional) misuse of the technology.
- If there are negative societal impacts, the authors could also discuss possible mitigation strategies (e.g., gated release of models, providing defenses in addition to attacks, mechanisms for monitoring misuse, mechanisms to monitor how a system learns from feedback over time, improving the efficiency and accessibility of ML).

## 11. Safeguards

Question: Does the paper describe safeguards that have been put in place for responsible release of data or models that have a high risk for misuse (e.g., pretrained language models, image generators, or scraped datasets)?

Answer: [NA]

Justification: There is no high risk for misuse associated with this method.

Guidelines:

- The answer NA means that the paper poses no such risks.
- Released models that have a high risk for misuse or dual-use should be released with necessary safeguards to allow for controlled use of the model, for example by requiring that users adhere to usage guidelines or restrictions to access the model or implementing safety filters.
- Datasets that have been scraped from the Internet could pose safety risks. The authors should describe how they avoided releasing unsafe images.
- We recognize that providing effective safeguards is challenging, and many papers do not require this, but we encourage authors to take this into account and make a best faith effort.

## 12. Licenses for existing assets

Question: Are the creators or original owners of assets (e.g., code, data, models), used in the paper, properly credited and are the license and terms of use explicitly mentioned and properly respected?

Answer: [Yes]

Justification: Original owners of assets are property credited in the reference.

Guidelines:

- The answer NA means that the paper does not use existing assets.
- The authors should cite the original paper that produced the code package or dataset.
- The authors should state which version of the asset is used and, if possible, include a URL.
- The name of the license (e.g., CC-BY 4.0) should be included for each asset.
- For scraped data from a particular source (e.g., website), the copyright and terms of service of that source should be provided.
- If assets are released, the license, copyright information, and terms of use in the package should be provided. For popular datasets, [paperswithcode.com/datasets](https://paperswithcode.com/datasets) has curated licenses for some datasets. Their licensing guide can help determine the license of a dataset.
- For existing datasets that are re-packaged, both the original license and the license of the derived asset (if it has changed) should be provided.

- If this information is not available online, the authors are encouraged to reach out to the asset’s creators.

### 13. New assets

Question: Are new assets introduced in the paper well documented and is the documentation provided alongside the assets?

Answer: [\[Yes\]](#)

Justification: The public code will be accompanied by documentation.

Guidelines:

- The answer NA means that the paper does not release new assets.
- Researchers should communicate the details of the dataset/code/model as part of their submissions via structured templates. This includes details about training, license, limitations, etc.
- The paper should discuss whether and how consent was obtained from people whose asset is used.
- At submission time, remember to anonymize your assets (if applicable). You can either create an anonymized URL or include an anonymized zip file.

### 14. Crowdsourcing and research with human subjects

Question: For crowdsourcing experiments and research with human subjects, does the paper include the full text of instructions given to participants and screenshots, if applicable, as well as details about compensation (if any)?

Answer: [\[Yes\]](#)

Justification: Full text of instructions given to participants and screenshots are provided in the supplementary materials.

Guidelines:

- The answer NA means that the paper does not involve crowdsourcing nor research with human subjects.
- Including this information in the supplemental material is fine, but if the main contribution of the paper involves human subjects, then as much detail as possible should be included in the main paper.
- According to the NeurIPS Code of Ethics, workers involved in data collection, curation, or other labor should be paid at least the minimum wage in the country of the data collector.

### 15. Institutional review board (IRB) approvals or equivalent for research with human subjects

Question: Does the paper describe potential risks incurred by study participants, whether such risks were disclosed to the subjects, and whether Institutional Review Board (IRB) approvals (or an equivalent approval/review based on the requirements of your country or institution) were obtained?

Answer: [\[NA\]](#)

Justification: There are no potential risks incurred by study participants.

Guidelines:

- The answer NA means that the paper does not involve crowdsourcing nor research with human subjects.
- Depending on the country in which research is conducted, IRB approval (or equivalent) may be required for any human subjects research. If you obtained IRB approval, you should clearly state this in the paper.
- We recognize that the procedures for this may vary significantly between institutions and locations, and we expect authors to adhere to the NeurIPS Code of Ethics and the guidelines for their institution.
- For initial submissions, do not include any information that would break anonymity (if applicable), such as the institution conducting the review.

762 **16. Declaration of LLM usage**  
763 Question: Does the paper describe the usage of LLMs if it is an important, original, or  
764 non-standard component of the core methods in this research? Note that if the LLM is used  
765 only for writing, editing, or formatting purposes and does not impact the core methodology,  
766 scientific rigorousness, or originality of the research, declaration is not required.  
767 Answer: [Yes]  
768 Justification: The usage of LLMs is described on multiple occasions in the manuscript and  
769 supplementary materials.  
770 Guidelines:  
771 • The answer NA means that the core method development in this research does not  
772 involve LLMs as any important, original, or non-standard components.  
773 • Please refer to our LLM policy (<https://neurips.cc/Conferences/2025/LLM>)  
774 for what should or should not be described.
